# Supplementary material for: Motion corrected water/fat whole‐heart coronary MR angiography with 100% respiratory efficiency
Source: PubMed Central journal article supplement (PMC6563440; doi:10.1002/mrm.27732), 2019-03-29
Supplement: MRM-82-732-s002.pdf [file MRM-82-732-s002.pdf]

| Image Metrics                       |         | NMC                     | TC                      | TC+GMD                | Gated       |
|-------------------------------------|---------|-------------------------|-------------------------|-----------------------|-------------|
| Normalised vessel length            |         |                         |                         |                       |             |
| RCA                                 | mean±SD | 67.6±16.6%              | 94.1±14.5%              | 105.0±7.5%            | NA          |
|                                     | p-value | $3.18 \times 10^{-4}$ * | $1.87 \times 10^{-1}$   | $7.91 \times 10^{-2}$ |             |
| LAD                                 | mean±SD | 74.6±22.1%              | 89.8±17.3%              | 104.9±10.3%           | NA          |
|                                     | p-value | $5.29 \times 10^{-3}$ * | $9.93 \times 10^{-2}$   | $1.73 \times 10^{-1}$ |             |
| Vessel sharpness (first 4 cm), a.u. |         |                         |                         |                       |             |
| RCA                                 | mean±SD | 0.282±0.047             | 0.381±0.072             | 0.446±0.062           | 0.467±0.078 |
|                                     | p-value | $1.83 \times 10^{-5}$ * | $2.75 \times 10^{-4}$ * | $1.60 \times 10^{-1}$ |             |
| LAD                                 | mean±SD | 0.269±0.045             | 0.389±0.047             | 0.436±0.021           | 0.442±0.059 |
|                                     | p-value | $2.70 \times 10^{-5}$ * | $4.14 \times 10^{-2}$   | $7.60 \times 10^{-1}$ |             |
| Vessel sharpness, a.u.              |         |                         |                         |                       |             |
| RCA                                 | mean±SD | 0.287±0.036             | 0.386±0.056             | 0.444±0.041           | 0.472±0.060 |
|                                     | p-value | $1.25 \times 10^{-5}$ * | $7.08 \times 10^{-4}$ * | $5.63 \times 10^{-2}$ |             |
| LAD                                 | mean±SD | 0.298±0.038             | 0.376±0.056             | 0.411±0.039           | 0.443±0.071 |
|                                     | p-value | $2.28 \times 10^{-4}$ * | $1.80 \times 10^{-2}$   | $1.50 \times 10^{-1}$ |             |

\*p-value < 0.01 vs. Gated

Supporting Information Table S1. Image quality metrics for the RCA and LAD arteries for NMC, TC, TC+GMD and Gated water images, including vessel length and vessel sharpness, for both the first 4 cm and full length of each vessel. p-values compared to the Gated images are indicated for each case. RCA: right coronary artery, LAD: left anterior descending artery. NMC: no motion corrected, TC: 2D translational motion corrected, TC+GMD: 2D translational plus 3D non-rigid motion-corrected, Gated: 1D diaphragmatic navigator gated and tracked acquisition.

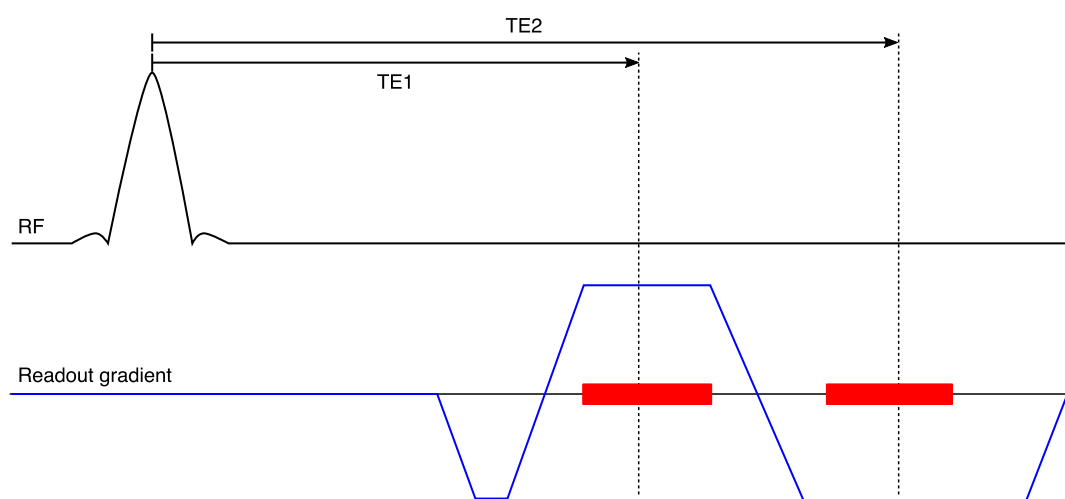

Supporting Information Figure S1. Pulse sequence diagram, showing RF excitations and readout gradient, indicating echo times TE1/TE2. The intervals where data is acquired are indicated in red.

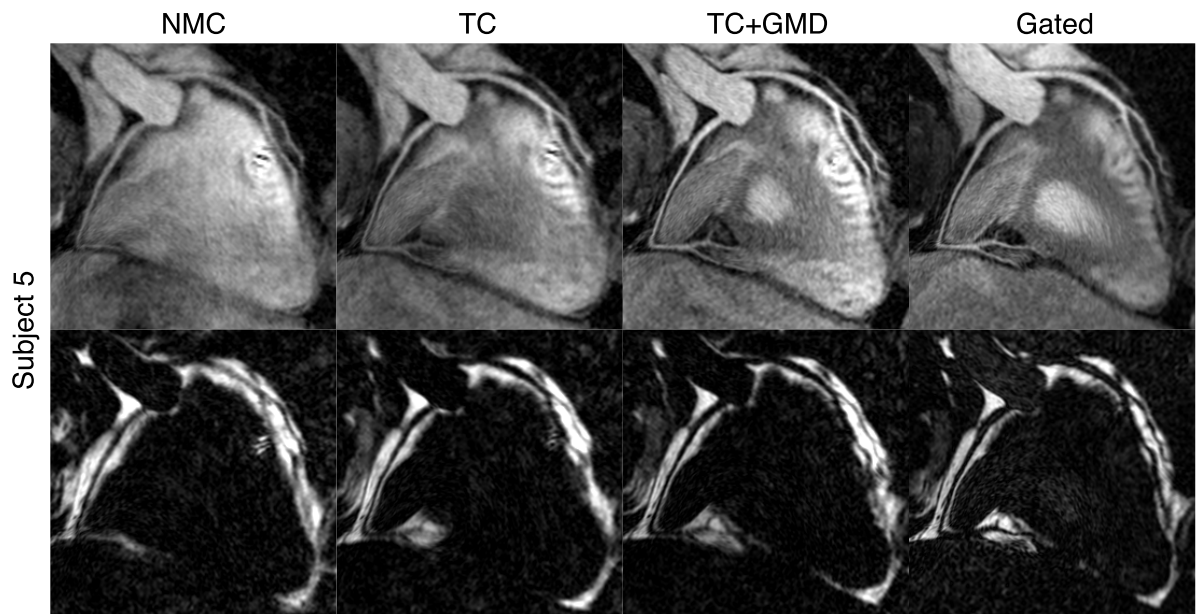

Supporting Information Figure S2. Reformatted CMRA water/fat images for an additional representative subject showing uncorrected (NMC), translational motion-corrected (TC), translational plus non-rigid motion-corrected (TC+GMD) and Gated images
